# Supplementary material for: MD-DFT Calculations on Dissociative Absorption Configurations of FOX-7 on (001)- and (101)-Oriented Crystalline Parylene Protective Membranes
Source: MDPI journal article supplement (doi:10.3390/polym16030438), 2024-02-05
Supplement: s1 [file s1]

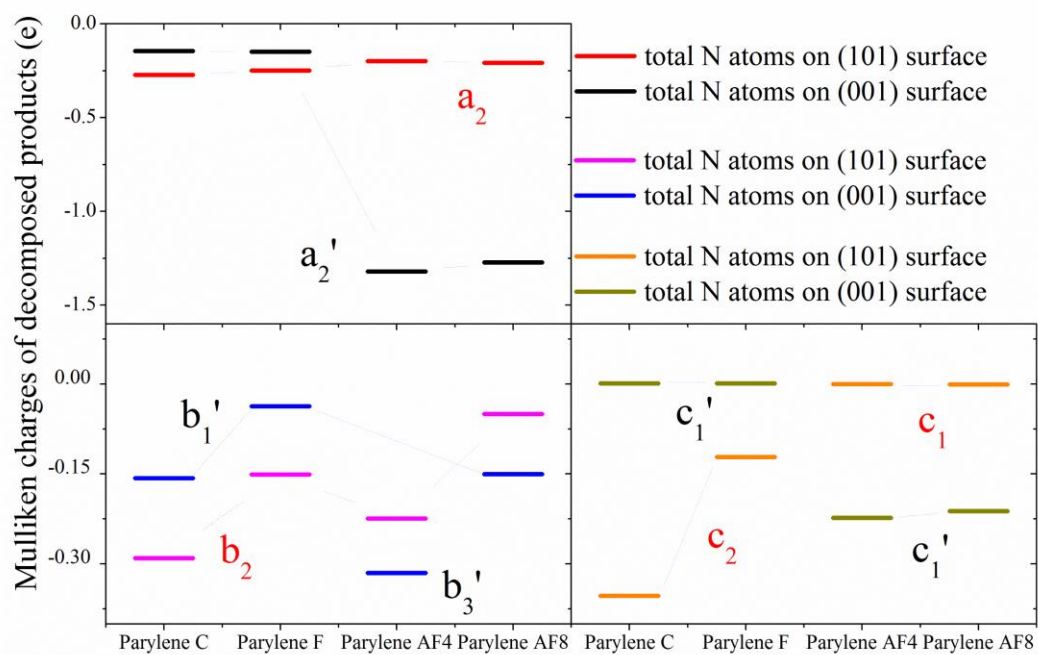

Figure S1. Mulliken charges of total N atoms of FOX-7's decomposition products on (101) and (001) orientated parylene membranes.
